# Supplementary material for: The Development of Functional Overreaching Is Associated with a Faster Heart Rate Recovery in Endurance Athletes
Source: PLoS One. 2015 Oct 21;10(10):e0139754. doi: 10.1371/journal.pone.0139754 (PMC4619310; doi:10.1371/journal.pone.0139754)
Supplement: S1 Fig — (XLSX) [file pone.0139754.s001.xlsx]

## Sheet: Performance
Functional Overreaching					Acute Fatigue					Control
	Pre	Mid	Post			Pre	Mid	Post			Pre	Mid	Post								Groupe CTL					Groupe AF					Groupe FOR
FOR1	325	320	331	-0.0153846	AF1	375	378	372	0.008	C1	325	321	313								Outcomes as percents		Mid-Pre	Post-Pre		Outcomes as percents		Mid-Pre	Post-Pre		Outcomes as percents		Mid-Pre	Post-Pre
FOR2	400	388	400	-0.03	AF2	333.333	338.75	356	0.01625	C2	392	392	396									P value	0.231709	0.254689			P value	0.000597984	0.0014758			P value	4.54673e-05	0.00831319
FOR3	310	300	313	-0.0322581	AF3	377.5	382	388	0.0119205	C3	350	364.583	360									Confidence level (%)	90	90			Confidence level (%)	90	90			Confidence level (%)	90	90
FOR4	400	383	400	-0.0425	AF4	350	354	375	0.0114286	C4	325	331	338									Degrees of freedom	9	9			Degrees of freedom	10	10			Degrees of freedom	9	9
FOR5	363	350	367	-0.0358127	AF5	353	361	379	0.0226629	C5	359	370	380									Change in mean (%)	0.887664	1.32391			Change in mean (%)	1.67567	3.93819			Change in mean (%)	-2.48012	1.43042
FOR6	389	381	393	-0.0205656	AF6	325	329	330	0.0123077	C6	342	350	356								Confidence limits (approx.)	lower	-0.378689	-0.664234		Confidence limits (approx.)	lower	1.0561	2.27346		Confidence limits (approx.)	lower	-3.09288	0.648837
FOR7	346	341	350	-0.0144509	AF7	379	380.417	384	0.00373791	C7	404	400	400					Trivial	#DIV/0!			upper	2.17011	3.35185			upper	2.29904	5.63001			upper	-1.86349	2.21808
FOR8	425	420	428	-0.0117647	AF8	408	425	427	0.0416667	C8	335	345	350					Small	#DIV/0!			"±" approx.	1.27117	2.00144			"±" approx.	0.613095	1.62772			"±" approx.	0.632314	0.776547
FOR9	389	383	405	-0.0154242	AF9	327	337.083	355	0.0308359	C9	364	359	350					Moderate	#DIV/0!		Thresholds for inferences	+ive or harmful	0.6	0.6		Thresholds for inferences	+ive or harmful	0.6	0.6		Thresholds for inferences	+ive or harmful	0.6	0.6
FOR10	375	364	388	-0.0293333	AF10	377.5	385.208	385	0.0204194	C10	350	344	350					Large	#DIV/0!			-ive or beneficial	-0.596421	-0.596421			-ive or beneficial	-0.596421	-0.596421			-ive or beneficial	-0.596421	-0.596421
					AF11	327.083	328.958	335	0.00573248									Very Large	#DIV/0!		Chances (% and qualitative) that the true value of the statistic is mechanistically or clinically (practically)…	substantially positive (+ive) or harmful	65.5851	73.8108		Chances (% and qualitative) that the true value of the statistic is mechanistically or clinically (practically)…	substantially positive (+ive) or harmful	99.4867	99.7821		Chances (% and qualitative) that the true value of the statistic is mechanistically or clinically (practically)…	substantially positive (+ive) or harmful	0.000410428	95.8392
Mean	372.2	363	377.5			357.492	363.583	371.455			354.6	357.658	359.3										possibly	possibly				very likely	most likely				most unlikely	very likely
SD	36.1687	35.6994	36.2989			27.7326	29.8033	27.0679			26.4247	25.0204	26.4577									trivial	31.4161	20.6638			trivial	0.510614	0.191286			trivial	0.017094	4.11101
FOR1	0	-5	6		AF1	0	3	-3		C1	0	-4	-12										possibly	unlikely				very unlikely	most unlikely				most unlikely	very unlikely
FOR2	0	-12	0		AF2	0	5.41667	22.6667		C2	0	0	4									substantially negative (-ive) or beneficial	2.99872	5.52544			substantially negative (-ive) or beneficial	0.00267709	0.0265745			substantially negative (-ive) or beneficial	99.9825	0.0498316
FOR3	0	-10	3		AF3	0	4.5	10.5		C3	0	14.5833	10										very unlikely	unlikely				most unlikely	most unlikely				most likely	most unlikely
FOR4	0	-17	0		AF4	0	4	25		C4	0	6	13
FOR5	0	-13	4		AF5	0	8	26		C5	0	11	21										unclear	unclear			increase	small	moderate		decrease	moderate	increase	trivial
FOR6	0	-8	4		AF6	0	4	5		C6	0	8	14															moderate	very large					moderate
FOR7	0	-5	4		AF7	0	1.41667	5		C7	0	-4	-4
FOR8	0	-5	3		AF8	0	17	19		C8	0	10	15
FOR9	0	-6	16		AF9	0	10.0833	28		C9	0	-5	-14
FOR10	0	-11	13		AF10	0	7.70833	7.5		C10	0	-6	0
					AF11	0	1.875	7.91667
Mean	0	-9.2	5.3			0	6.09091	13.9621			0	3.05833	4.7					absolu	relatif
SD	0	4.1042	5.22919			0	4.49571	10.5052			0	7.69661	11.9355				variation	#DIV/0!	1.38		Groupe CTL Vs AF						Groupe CTL Vs FOR						Groupe AF Vs F-OR
																	moy	356.129	99.14		Outcomes as percents		Mid-Pre	Post-Mid	Post-Pre		Outcomes as percents		Mid-Pre	Post-Mid	Post-Pre		Outcomes as percents		Mid-Pre	Post-Mid	Post-Pre
																		#DIV/0!	0.0139197			Confidence level (%)	90	90	90			Confidence level (%)	90	90	90			Confidence level (%)	90	90	90
																						Degrees of freedom	13.1487	18.4137	17.9315			Degrees of freedom	13.2205	16.4224	11.6805			Degrees of freedom	19.1319	15.9824	11.8834
																						Difference in means (%)	0.781075	1.7851	2.58012			Difference in means (%)	-3.33816	3.56219	0.105119			Difference in means (%)	-3.81811	1.55078	-2.47012
																					Confidence limits (approx.)	lower	-0.578889	0.0755329	0.110605		Confidence limits (approx.)	lower	-4.64749	2.21763	-1.95958		Confidence limits (approx.)	lower	-4.70806	-0.0115682	-4.28748
																						upper	2.15964	3.52387	5.11055			upper	-2.01085	4.92443	2.2133			upper	-2.91985	3.13754	-0.618251
																						"±" approx.	1.36926	1.72417	2.49997			"±" approx.	1.31832	1.3534	2.08644			"±" approx.	0.894109	1.57455	1.83461
																					Thresholds for inferences	+ive or harmful	0.6	0.6	0.6		Thresholds for inferences	+ive or harmful	0.6	0.6	0.6		Thresholds for inferences	+ive or harmful	0.6	0.6	0.6
																						-ive or beneficial	-0.596421	-0.596421	-0.596421			-ive or beneficial	-0.596421	-0.596421	-0.596421			-ive or beneficial	-0.596421	-0.596421	-0.596421
																					Chances (% and qualitative) that the true value of the statistic is mechanistically or clinically (practically)…	substantially positive (+ive) or harmful	59.0841	87.6953	90.8988		Chances (% and qualitative) that the true value of the statistic is mechanistically or clinically (practically)…	substantially positive (+ive) or harmful	0.00877381	99.9332	33.9535		Chances (% and qualitative) that the true value of the statistic is mechanistically or clinically (practically)…	substantially positive (+ive) or harmful	4.37931e-06	84.7832	0.649751
																							possibly	likely	likely				most unlikely	most likely	possibly				most unlikely	likely	very unlikely
																		Trivial	0.00585831			trivial	36.1106	10.9987	7.18525			trivial	0.143262	0.0643026	38.2064			trivial	0.000337761	13.7725	4.17816
																		Small	0.0175749				possibly	unlikely	unlikely				most unlikely	most unlikely	possibly				most unlikely	unlikely	very unlikely
																		Moderate	0.0312443			substantially negative (-ive) or beneficial	4.80528	1.30594	1.91591			substantially negative (-ive) or beneficial	99.848	0.00254206	27.8402			substantially negative (-ive) or beneficial	99.9997	1.44431	95.1721
																		Large	0.0488192				very unlikely	very unlikely	very unlikely				most likely	most unlikely	possibly				most likely	very unlikely	very likely
																		Very Large	0.0781108

## Sheet: Fatigue
Functional Overreaching					Acute Fatigue					Control
	Pre	Mid	Post			Pre	Mid	Post			Pre	Mid	Post				CTL					AF					FOR
FOR1	2	4	2		AF1	16	13	16		C1	5	11	0				Log-transformed Data					Log-transformed Data					Log-transformed Data
FOR2	1	12	13		AF2	0	4	5		C2	2	6	7				Outcomes as percents		Mid-Pre	Post-Pre		Outcomes as percents		Mid-Pre	Post-Pre		Outcomes as percents		Mid-Pre	Post-Pre
FOR3	0	9	0		AF3	5	6	2		C3	0	2	0					P value	0.0356477	0.234734			P value	0.00363027	0.795734			P value	0.00127152	0.95183
FOR4	0	11	0		AF4	12	12	7		C4	10	13	6					Confidence level (%)	90	90			Confidence level (%)	90	90			Confidence level (%)	90	90
FOR5	7	21	1		AF5	7	15	6		C5	2	9	5					Degrees of freedom	7	6			Degrees of freedom	9	8			Degrees of freedom	7	5
FOR6	8	14	0		AF6	2	7	6		C6	9	7	8					Change in mean (%)	71.5682	37.5868			Change in mean (%)	83.8833	-4.83781			Change in mean (%)	274.222	4.15649
FOR7	2	13	1		AF7	3	6	3		C7	1	1	1				Confidence limits (approx.)	lower	15.6974	-13.9626		Confidence limits (approx.)	lower	38.082	-32.571		Confidence limits (approx.)	lower	131.088	-71.396
FOR8	4	17	11		AF8	1	2	0		C8	4	5	4					upper	154.42	120.022			upper	144.877	34.3019			upper	506.012	279.268
FOR9	10	17	0		AF9	5	17	4		C9	1	2	2					"±" approx.	48.2906	59.9151			"±" approx.	33.1697	41.1295			"±" approx.	61.9392	264.132
FOR10	2	13	1		AF10	3	8	4		C10	0	2	2				Thresholds for inferences	+ive or harmful	25	25		Thresholds for inferences	+ive or harmful	25	25		Thresholds for inferences	+ive or harmful	25	25
					AF11	6	10	6										-ive or beneficial	-20	-20			-ive or beneficial	-20	-20			-ive or beneficial	-20	-20
Mean	3.6	13.1	2.9			5.45455	9.09091	5.36364			3.4	5.8	3.5				Chances (% and qualitative) that the true value of the statistic is mechanistically or clinically (practically)…	substantially positive (+ive) or harmful	91.4176	64.7485		Chances (% and qualitative) that the true value of the statistic is mechanistically or clinically (practically)…	substantially positive (+ive) or harmful	98.2217	8.96015		Chances (% and qualitative) that the true value of the statistic is mechanistically or clinically (practically)…	substantially positive (+ive) or harmful	99.8238	39.3742
SD	3.53396	4.70106	4.8637			4.80341	4.72132	4.081			3.59629	4.18463	2.91548						likely	possibly				very likely	unlikely				most likely	possibly
FOR1	0	2	0		AF1	0	-3	0		C1	0	6	-5					trivial	8.18352	31.9538			trivial	1.75447	72.2261			trivial	0.150778	25.7358
FOR2	0	11	12		AF2	0	4	5		C2	0	4	5						unlikely	possibly				very unlikely	possibly				most unlikely	possibly
FOR3	0	9	0		AF3	0	1	-3		C3	0	2	0					substantially negative (-ive) or beneficial	0.398901	3.29771			substantially negative (-ive) or beneficial	0.0238596	18.8137			substantially negative (-ive) or beneficial	0.0254509	34.8901
FOR4	0	11	0		AF4	0	0	-5		C4	0	3	-4						most unlikely	very unlikely				most unlikely	unlikely				most unlikely	possibly
FOR5	0	14	-6		AF5	0	8	-1		C5	0	7	3
FOR6	0	6	-8		AF6	0	5	4		C6	0	-2	-1
FOR7	0	11	-1		AF7	0	3	0		C7	0	0	0
FOR8	0	13	7		AF8	0	1	-1		C8	0	1	0
FOR9	0	7	-10		AF9	0	12	-1		C9	0	1	1
FOR10	0	11	-1		AF10	0	5	1		C10	0	2	2
					AF11	0	4	0
Mean	0	9.5	-0.7			0	3.63636	-0.0909091			0	2.4	0.1
SD	0	3.59784	6.58365			0	4.05642	2.80908			0	2.71621	2.99815			CTL vs AF						CTL vs FOR						AF vs FOR
																Log-transformed Data		Exptal-Control difference				Log-transformed Data		Exptal-Control difference				Log-transformed Data		Exptal-Control difference
																Outcomes as percents		Mid-Pre	Post-Mid	Post-Pre		Outcomes as percents		Mid-Pre	Post-Mid	Post-Pre		Outcomes as percents		Mid-Pre	Post-Mid	Post-Pre
																	Confidence level (%)	90	90	90			Confidence level (%)	90	90	90			Confidence level (%)	90	90	90
																	Degrees of freedom	13.7315	15.3672	12.015			Degrees of freedom	13.4667	5.4975	6.41216			Degrees of freedom	11.9539	5.9902	6.0792
																	Difference in means (%)	7.17792	-32.9731	-30.8348			Difference in means (%)	118.118	-74.7182	-24.2976			Difference in means (%)	103.511	-62.2811	10.1321
																Confidence limits (approx.)	lower	-32.3859	-53.5416	-59.7999		Confidence limits (approx.)	lower	21.8859	-91.8008	-80.0134		Confidence limits (approx.)	lower	19.0426	-88.0745	-70.3238
																	upper	69.8923	-3.29825	19.0003			upper	290.33	-22.045	186.735			upper	247.914	19.3	308.713
																	"±" approx.	51.1391	25.1217	39.4001			"±" approx.	134.222	34.8779	133.374			"±" approx.	114.436	53.6873	189.518
																Thresholds for inferences	+ive or harmful	25	25	25		Thresholds for inferences	+ive or harmful	25	25	25		Thresholds for inferences	+ive or harmful	25	25	25
																	-ive or beneficial	-20	-20	-20			-ive or beneficial	-20	-20	-20			-ive or beneficial	-20	-20	-20
																Chances (% and qualitative) that the true value of the statistic is mechanistically or clinically (practically)…	substantially positive (+ive) or harmful	28.222	0.466618	3.78676		Chances (% and qualitative) that the true value of the statistic is mechanistically or clinically (practically)…	substantially positive (+ive) or harmful	94.2979	1.7703	24.5949		Chances (% and qualitative) that the true value of the statistic is mechanistically or clinically (practically)…	substantially positive (+ive) or harmful	93.4561	4.50637	42.8668
																		possibly	most unlikely	very unlikely				likely	very unlikely	unlikely				likely	very unlikely	possibly
																	trivial	57.717	20.0697	28.2754			trivial	5.2391	2.94304	22.3253			trivial	6.06241	7.76154	24.5094
																		possibly	unlikely	possibly				unlikely	very unlikely	unlikely				unlikely	unlikely	unlikely
																	substantially negative (-ive) or beneficial	14.061	79.4637	67.9378			substantially negative (-ive) or beneficial	0.462989	95.2867	53.0797			substantially negative (-ive) or beneficial	0.481469	87.7321	32.6238
																		unlikely	likely	possibly				most unlikely	very likely	possibly				most unlikely	likely	possibly
