# Supplementary material for: The Development of Functional Overreaching Is Associated with a Faster Heart Rate Recovery in Endurance Athletes
Source: PLoS One. 2015 Oct 21;10(10):e0139754. doi: 10.1371/journal.pone.0139754 (PMC4619310; doi:10.1371/journal.pone.0139754)
Supplement: S2 Fig — (XLSX) [file pone.0139754.s002.xlsx]

## Sheet: HRpeak
Functional Overreaching					Acute Fatigue					Control
	Pre	Post	T2			Pre	Post	T2			Pre	Post	T2	CV				Groupe CTL					Groupe AF					Groupe F-OR
FOR1	180	175	180		AF1	178	176	176		C1	188	184	182	0.0215054				Outcomes as percents		Mid-Pre	Post-Pre		Outcomes as percents		Mid-Pre	Post-Pre		Outcomes as percents		Mid-Pre	Post-Pre
FOR2	185	178	184		AF2	161	163	166		C2	192	189	189	0.015748					P value	0.691808	0.189499			P value	0.3663	0.983125			P value	3.62496e-05	0.0757198
FOR3	180	179	181		AF3	186	186	192		C3	180	180	182	0					Confidence level (%)	90	90			Confidence level (%)	90	90			Confidence level (%)	90	90
FOR4	171	165	168		AF4	189	191	193		C4	182	182	181	0					Degrees of freedom	9	9			Degrees of freedom	10	10			Degrees of freedom	9	9
FOR5	189	185	185		AF5	192	184	189		C5	189	196	196	0.0363636		Trivial	0.00397759		Change in mean (%)	-0.269938	-1.00237			Change in mean (%)	-0.483472	-0.0139001			Change in mean (%)	-3.08682	-0.775025
FOR6	184	176	183		AF6	185	184	185		C6	179	181	178	0.0111111		Small	0.0119328	Confidence limits (approx.)	lower	-1.46965	-2.28213		Confidence limits (approx.)	lower	-1.40296	-1.16884		Confidence limits (approx.)	lower	-3.82495	-1.47773
FOR7	189	185	190		AF7	190	192	192		C7	188	189	188	0.00530504		Moderate	0.0212138		upper	0.944384	0.294142			upper	0.444587	1.15453			upper	-2.34303	-0.0673111
FOR8	184	177	179		AF8	172	174	169		C8	192	184	188	0.0425532		Large	0.0331466		"±" approx.	1.21761	1.30964			"±" approx.	0.932567	1.1686			"±" approx.	0.767485	0.713242
FOR9	178	173	179		AF9	191	189	189		C9	178	178	172	0		Very Large	0.0530346	Thresholds for inferences	+ive or harmful	0.4	0.4		Thresholds for inferences	+ive or harmful	0.4	0.4		Thresholds for inferences	+ive or harmful	0.4	0.4
FOR10	181	172	178		AF10	176	172	170		C10	182	182	176	0					-ive or beneficial	-0.398406	-0.398406			-ive or beneficial	-0.398406	-0.398406			-ive or beneficial	-0.398406	-0.398406
					AF11	185	184	184										Chances (% and qualitative) that the true value of the statistic is mechanistically or clinically (practically)…	substantially positive (+ive) or harmful	16.8518	3.94196		Chances (% and qualitative) that the true value of the statistic is mechanistically or clinically (practically)…	substantially positive (+ive) or harmful	5.75488	26.6894		Chances (% and qualitative) that the true value of the statistic is mechanistically or clinically (practically)…	substantially positive (+ive) or harmful	0.000696222	0.704951
Mean	182.1	176.5	180.7			182.273	181.364	182.273			185	184.5	183.2	0.0132586						unlikely	very unlikely				unlikely	possibly				most unlikely	very unlikely
SD	5.38413	5.9675	5.73585			9.59261	9.02522	10.1793			5.37484	5.38	7.11493						trivial	40.671	16.7446			trivial	37.7865	45.2523			trivial	0.00449866	16.9968
FOR1	0	-5	0		AF1	0	-2	-2		C1	0	-4	-6							possibly	unlikely				possibly	possibly				most unlikely	unlikely
FOR2	0	-7	-1		AF2	0	2	5		C2	0	-3	-3						substantially negative (-ive) or beneficial	42.4772	79.3134			substantially negative (-ive) or beneficial	56.4586	28.0583			substantially negative (-ive) or beneficial	99.9948	82.2983
FOR3	0	-1	1		AF3	0	0	6		C3	0	0	2							possibly	likely				possibly	possibly				most likely	likely
FOR4	0	-6	-3		AF4	0	2	4		C4	0	0	-1
FOR5	0	-4	-4		AF5	0	-8	-3		C5	0	7	7							unclear	decrease				unclear	unclear				decrease	trivial
FOR6	0	-8	-1		AF6	0	-1	0		C6	0	2	-1								trivial									large	moderate
FOR7	0	-4	1		AF7	0	2	2		C7	0	1	0								moderate									to very large
FOR8	0	-7	-5		AF8	0	2	-3		C8	0	-8	-4
FOR9	0	-5	1		AF9	0	-2	-2		C9	0	0	-6
FOR10	0	-9	-3		AF10	0	-4	-6		C10	0	0	-6
					AF11	0	-1	-1
Mean	0	-5.6	-1.4			0	-0.909091	0			0	-0.5	-1.8					Groupe CTL Vs AF					Groupe CTL Vs F-OR					Groupe AF Vs F-OR
SD	0	2.319	2.22111			0	3.11302	3.79473			0	3.95109	4.15799					Outcomes as percents		Mid-Pre	Post-Pre		Outcomes as percents		Mid-Pre	Post-Pre		Outcomes as percents		Mid-Pre	Post-Pre
																			Confidence level (%)	90	90			Confidence level (%)	90	90			Confidence level (%)	90	90
																			Degrees of freedom	17.415	18.5575			Degrees of freedom	15.1966	13.9314			Degrees of freedom	18.5815	13.9727
																			Difference in means (%)	-0.214112	0.998483			Difference in means (%)	-2.82451	0.229652			Difference in means (%)	-2.616	-0.813625
																		Confidence limits (approx.)	lower	-1.65408	-0.662739		Confidence limits (approx.)	lower	-4.14578	-1.19571		Confidence limits (approx.)	lower	-3.72501	-2.21878
																			upper	1.24694	2.68749			upper	-1.48503	1.67557			upper	-1.49421	0.61172
																			"±" approx.	1.45051	1.67511			"±" approx.	1.33037	1.43564			"±" approx.	1.1154	1.41525
																		Thresholds for inferences	+ive or harmful	0.4	0.4		Thresholds for inferences	+ive or harmful	0.4	0.4		Thresholds for inferences	+ive or harmful	0.4	0.4
																			-ive or beneficial	-0.398406	-0.398406			-ive or beneficial	-0.398406	-0.398406			-ive or beneficial	-0.398406	-0.398406
																		Chances (% and qualitative) that the true value of the statistic is mechanistically or clinically (practically)…	substantially positive (+ive) or harmful	23.6393	72.8942		Chances (% and qualitative) that the true value of the statistic is mechanistically or clinically (practically)…	substantially positive (+ive) or harmful	0.0402282	41.8476		Chances (% and qualitative) that the true value of the statistic is mechanistically or clinically (practically)…	substantially positive (+ive) or harmful	0.0106858	7.75474
																Trivial	0.00397759			unlikely	possibly				most unlikely	possibly				most unlikely	unlikely
																Small	0.0119328		trivial	34.9836	18.978			trivial	0.284896	35.6049			trivial	0.145737	22.8861
																Moderate	0.0212138			possibly	unlikely				most unlikely	possibly				most unlikely	unlikely
																Large	0.0331466		substantially negative (-ive) or beneficial	41.3771	8.12783			substantially negative (-ive) or beneficial	99.6749	22.5475			substantially negative (-ive) or beneficial	99.8436	69.3591
																Very Large	0.0530346			possibly	unlikely				most likely	unlikely				most likely	possibly
																				unclear	unclear				moderate	unclear				very large	unclear
																									very large					ext large

## Sheet: HR60s
Functional Overreaching					Acute Fatigue					Control
	Pre	Post	T2			Pre	Post	T2			Pre	Post	T2
FOR1	150	145	152		AF1	148	146	149		C1	155	156	149
FOR2	153	131	146		AF2	121	124	128		C2	162	159	159
FOR3	146	142	146		AF3	132	129	138		C3	138	156	151
FOR4	144	123	131		AF4	143	141	147		C4	152	154	150
FOR5	148	138	150		AF5	148	137	146		C5	133	128	143
FOR6	147	125	146		AF6	138	145	146		C6	155	156	154
FOR7	156	141	153		AF7	155	153	157		C7	156	157	154
FOR8	152	142	141		AF8	142	140	140		C8	149	142	146
FOR9	132	124	134		AF9	151	132	141		C9	136	136	140
FOR10	117	101	121		AF10	145	143	138		C10	152	158	149
					AF11	138	138	131
Mean	144.5	131.2	142		Mean	141.909	138.909	141.909		Mean	148.8	150.2	149.5
SD	11.6643	13.4809	10.328		SD	9.51267	8.25172	8.27592		SD	9.73881	10.8607	5.56277

## Sheet: HRR60s
Functional Overreaching					Acute Fatigue					Control
	Pre	Mid	Post			Pre	Mid	Post			Pre	Mid	Post	CV					Groupe CTL					Groupe AF					Groupe F-OR
FOR1	30	30	28		AF1	30	30	27		C1	33	28	33	0.163934					Outcomes as percents		Mid-Pre	Post-Pre		Outcomes as percents		Mid-Pre	Post-Pre		Outcomes as percents		Mid-Pre	Post-Pre
FOR2	32	47	38		AF2	40	39	38		C2	30	30	30	0						P value	0.155018	0.544225			P value	0.302698	0.845307			P value	0.00338076	0.374334
FOR3	34	37	35		AF3	54	57	54		C3	26	24	30	0.08						Confidence level (%)	90	90			Confidence level (%)	90	90			Confidence level (%)	90	90
FOR4	27	42	37		AF4	46	50	46		C4	30	28	31	0.0689655						Degrees of freedom	9	9			Degrees of freedom	10	10			Degrees of freedom	9	9
FOR5	41	47	35		AF5	44	47	43		C5	56	62	53	0.101695		Trivial	0.0224983			Change in mean (%)	-4.55498	-2.16981			Change in mean (%)	4.56337	-0.597447			Change in mean (%)	21.0769	4.46848
FOR6	37	51	37		AF6	47	39	39		C6	24	25	24	0.0408163		Small	0.0674949		Confidence limits (approx.)	lower	-9.66768	-8.21725		Confidence limits (approx.)	lower	-2.93668	-5.84542		Confidence limits (approx.)	lower	10.7808	-4.11462
FOR7	33	44	37		AF7	35	39	35		C7	32	32	34	0		Moderate	0.119991			upper	0.847087	4.27609			upper	12.6429	4.94303			upper	32.3299	13.8199
FOR8	32	35	38		AF8	30	34	29		C8	43	42	42	0.0235294		Large	0.187486			"±" approx.	5.65987	6.58887			"±" approx.	7.72697	5.57378			"±" approx.	9.29413	8.95141
FOR9	46	49	45		AF9	40	57	48		C9	42	40	32	0.0487805		Very large	0.299977		Thresholds for inferences	+ive or harmful	0.67	0.67		Thresholds for inferences	+ive or harmful	0.67	0.67		Thresholds for inferences	+ive or harmful	0.67	0.67
FOR10	64	71	57		AF10	31	29	32		C10	30	24	27	0.222222						-ive or beneficial	-0.665541	-0.665541			-ive or beneficial	-0.665541	-0.665541			-ive or beneficial	-0.665541	-0.665541
					AF11	47	46	53											Chances (% and qualitative) that the true value of the statistic is mechanistically or clinically (practically)…	substantially positive (+ive) or harmful	5.48543	21.6145		Chances (% and qualitative) that the true value of the statistic is mechanistically or clinically (practically)…	substantially positive (+ive) or harmful	81.1383	34.0491		Chances (% and qualitative) that the true value of the statistic is mechanistically or clinically (practically)…	substantially positive (+ive) or harmful	99.7914	77.5616
Mean	37.6	45.3	38.7			40.3636	42.4545	40.3636			34.6	33.5	33.6	0.0749943							unlikely	unlikely				likely	possibly				most likely	likely
SD	10.7827	11.2255	7.64562			8.06564	9.78124	9.25497			9.67471	11.8063	8.28922							trivial	5.32776	11.9581			trivial	6.86032	16.8419			trivial	0.0712045	6.97387
FOR1	0	0	-2		AF1	0	0	-3		C1	0	-5	0								unlikely	unlikely				unlikely	unlikely				most unlikely	unlikely
FOR2	0	15	6		AF2	0	-1	-2		C2	0	0	0							substantially negative (-ive) or beneficial	89.1868	66.4274			substantially negative (-ive) or beneficial	12.0014	49.1091			substantially negative (-ive) or beneficial	0.137358	15.4645
FOR3	0	3	1		AF3	0	3	0		C3	0	-2	4								likely	possibly				unlikely	possibly				most unlikely	unlikely
FOR4	0	15	10		AF4	0	4	0		C4	0	-2	1
FOR5	0	6	-6		AF5	0	3	-1		C5	0	6	-3								unclear	unclear				unclear	unclear			increase	extremely large	unclear
FOR6	0	14	0		AF6	0	-8	-8		C6	0	1	0
FOR7	0	11	4		AF7	0	4	0		C7	0	0	2
FOR8	0	3	6		AF8	0	4	-1		C8	0	-1	-1
FOR9	0	3	-1		AF9	0	17	8		C9	0	-2	-10
FOR10	0	7	-7		AF10	0	-2	1		C10	0	-6	-3
					AF11	0	-1	6
Mean	0	7.7	1.1			0	2.09091	0			0	-1.1	-1							Groupe CTL Vs AF				Groupe CTL Vs F-OR					Groupe AF Vs F-OR
SD	0	5.63816	5.44569			0	6.13929	4.24264			0	3.31495	3.80058						Outcomes as percents		Mid-Pre	Post-Pre		Outcomes as percents		Mid-Pre	Post-Pre		Outcomes as percents		Mid-Pre	Post-Pre
																				Confidence level (%)	90	90			Confidence level (%)	90	90			Confidence level (%)	90	90
																				Degrees of freedom	17.8761	18.2486			Degrees of freedom	15.021	16.6299			Degrees of freedom	18.1422	15.3347
																				Difference in means (%)	9.55351	1.60723			Difference in means (%)	26.8551	6.78552			Difference in means (%)	15.7928	6.43042
																			Confidence limits (approx.)	lower	0.274187	-6.16733		Confidence limits (approx.)	lower	14.7858	-3.54889		Confidence limits (approx.)	lower	3.71291	-3.44777
																				upper	19.6915	10.026			upper	40.1934	18.2272			upper	29.2797	17.3192
																Trivial	0.0224983			"±" approx.	9.70867	8.09664			"±" approx.	12.7038	10.888			"±" approx.	12.7834	10.3835
																Small	0.0674949		Thresholds for inferences	+ive or harmful	0.67	0.67		Thresholds for inferences	+ive or harmful	0.67	0.67		Thresholds for inferences	+ive or harmful	0.67	0.67
																Moderate	0.119991			-ive or beneficial	-0.665541	-0.665541			-ive or beneficial	-0.665541	-0.665541			-ive or beneficial	-0.665541	-0.665541
																Large	0.187486		Chances (% and qualitative) that the true value of the statistic is mechanistically or clinically (practically)…	substantially positive (+ive) or harmful	94.2598	57.886		Chances (% and qualitative) that the true value of the statistic is mechanistically or clinically (practically)…	substantially positive (+ive) or harmful	99.9481	83.6599		Chances (% and qualitative) that the true value of the statistic is mechanistically or clinically (practically)…	substantially positive (+ive) or harmful	97.9558	83.3748
																Very large	0.299977				likely	possibly				most likely	likely				very likely	likely
																				trivial	2.18166	10.7087			trivial	0.0195939	4.70889			trivial	0.708846	4.95598
																					very unlikely	unlikely				most unlikely	very unlikely				very unlikely	very unlikely
																				substantially negative (-ive) or beneficial	3.55859	31.4053			substantially negative (-ive) or beneficial	0.032356	11.6312			substantially negative (-ive) or beneficial	1.33534	11.6692
																					very unlikely	possibly				most unlikely	unlikely				very unlikely	unlikely
																					trivial	unclear				extremely large	unclear				large to ext	unclear
																					very large
																								Outcomes as percents		Mid-Pre	Post-Pre		Outcomes as percents		Mid-Pre	Post-Pre
																									Confidence level (%)	90	90			Confidence level (%)	90	90
																									Degrees of freedom	11.2647	12.9434			Degrees of freedom	14.9854	12.2409
																									Difference in means (%)	24.3848	5.16884			Difference in means (%)	11.5455	4.72645
																								Confidence limits (approx.)	lower	7.05643	-10.0823		Confidence limits (approx.)	lower	-5.11832	-9.86323
																									upper	44.5179	23.0068			upper	31.1359	21.6776
																									"±" approx.	18.7308	16.5446			"±" approx.	18.1271	15.7704
																								Thresholds for inferences	+ive or harmful	0.67	0.67		Thresholds for inferences	+ive or harmful	0.67	0.67
																									-ive or beneficial	-0.665541	-0.665541			-ive or beneficial	-0.665541	-0.665541
																								Chances (% and qualitative) that the true value of the statistic is mechanistically or clinically (practically)…	substantially positive (+ive) or harmful	98.6067	68.6033		Chances (% and qualitative) that the true value of the statistic is mechanistically or clinically (practically)…	substantially positive (+ive) or harmful	85.8538	67.6369
																										very likely	possibly				likely	possibly
																									trivial	0.345646	4.97699			trivial	2.76909	5.27357
																										most unlikely	very unlikely				very unlikely	unlikely
																									substantially negative (-ive) or beneficial	1.04761	26.4197			substantially negative (-ive) or beneficial	11.3771	27.0895
																										very unlikely	possibly				unlikely	possibly
																										very large					unclear

## Sheet: Lapeak
Functional Overreaching					Acute Fatigue					Control
	Pre	Post	T2			Pre	Post	T2			Pre	Post	T2							CTL					AF					FOR
FOR1	11	13.3	12		AF1	8.6	8.3	8.9		C1	12.7	12.3	10.4							Outcomes as percents		Mid-Pre	Post-Pre		Outcomes as percents		Mid-Pre	Post-Pre		Outcomes as percents		Mid-Pre	Post-Pre
FOR2	10.7	9.8	13.2		AF2	14.8	10.9	16.3		C2	11.9	12.2	12.2								P value	0.807406	0.255636			P value	0.162985	0.852349			P value	0.0186973	0.503184
FOR3	9.1	8.1	9.3		AF3	11.8	15.1	17.1		C3	14	12.1	10.7								Confidence level (%)	90	90			Confidence level (%)	90	90			Confidence level (%)	90	90
FOR4	11.1	9.1	11		AF4	11.6	10.3	10.2		C4	9.7	11.1	10.3								Degrees of freedom	9	9			Degrees of freedom	10	10			Degrees of freedom	9	9
FOR5	13.9	11.9	13.2		AF5	13.1	9.6	14.9		C5	12	11.9	12.9								Change in mean (%)	0.643767	-4.59309			Change in mean (%)	-7.54185	-1.11729			Change in mean (%)	-12.1126	2.44585
FOR6	14.2	11.4	14.6		AF6	14.1	11.3	12.3		C6	12.1	12.2	11.4							Confidence limits (approx.)	lower	-3.96303	-11.1318		Confidence limits (approx.)	lower	-15.8682	-11.1177		Confidence limits (approx.)	lower	-19.0865	-3.85894
FOR7	14.3	14.3	15.4		AF7	10.4	10.1	10.8		C7	14.3	14.3	13.6								upper	5.47155	2.42675			upper	1.6085	10.0083			upper	-4.53753	9.16411
FOR8	17.4	13.7	14		AF8	14.1	11.9	9.9		C8	13.9	13	15								"±" approx.	4.7969	7.35779			"±" approx.	9.89674	11.2513			"±" approx.	8.61904	6.55786
FOR9	12	10.4	12.4		AF9	10.7	11.9	9.9		C9	12.1	12.6	10.4							Thresholds for inferences	+ive or harmful	1.7	1.7		Thresholds for inferences	+ive or harmful	1.7	1.7		Thresholds for inferences	+ive or harmful	1.7	1.7
FOR10	10.2	7.4	10.9		AF10	11.7	10.8	9.6		C10	11.3	12.6	11.6								-ive or beneficial	-1.67158	-1.67158			-ive or beneficial	-1.67158	-1.67158			-ive or beneficial	-1.67158	-1.67158
					AF11	13.9	14.7	15.4												Chances (% and qualitative) that the true value of the statistic is mechanistically or clinically (practically)…	substantially positive (+ive) or harmful	34.6243	6.67471		Chances (% and qualitative) that the true value of the statistic is mechanistically or clinically (practically)…	substantially positive (+ive) or harmful	4.86079	32.1617		Chances (% and qualitative) that the true value of the statistic is mechanistically or clinically (practically)…	substantially positive (+ive) or harmful	0.510805	58.1161
Mean	12.39	10.94	12.6			12.2545	11.3545	12.3			12.4	12.43	11.85									possibly	unlikely				very unlikely	possibly				very unlikely	possibly
SD	2.50619	2.38477	1.86369			1.92009	2.03537	3.04039			1.39841	0.827379	1.5778								trivial	46.0629	16.1303			trivial	8.36209	21.5503			trivial	1.21323	28.5444
FOR1	0	2.3	1		AF1	0	-0.3	0.3		C1	0	-0.4	-2.3										trivial	46.6758				trivial	51.0805				trivial	0.184588	44.8321
FOR2	0	-0.9	2.5		AF2	0	-3.9	1.5		C2	0	0.3	0.3											possibly					possibly					most unlikely	possibly
FOR3	0	-1	0.2		AF3	0	3.3	5.3		C3	0	-1.9	-3.3										substantially negative (-ive) or beneficial	27.5991				substantially negative (-ive) or beneficial	37.0251				substantially negative (-ive) or beneficial	99.7913	33.2285
FOR4	0	-2	-0.1		AF4	0	-1.3	-1.4		C4	0	1.4	0.6											possibly					possibly					most likely	possibly
FOR5	0	-2	-0.7		AF5	0	-3.5	1.8		C5	0	-0.1	0.9											unclear					unclear					decrease small	unclear
FOR6	0	-2.8	0.4		AF6	0	-2.8	-1.8		C6	0	0.1	-0.7																					to moderate
FOR7	0	0	1.1		AF7	0	-0.3	0.4		C7	0	0	-0.7
FOR8	0	-3.7	-3.4		AF8	0	-2.2	-4.2		C8	0	-0.9	1.1									Groupe CTL Vs AF					Groupe CTL Vs F-OR					Groupe AF Vs F-OR
FOR9	0	-1.6	0.4		AF9	0	1.2	-0.8		C9	0	0.5	-1.7									Outcomes as percents		Mid-Pre			Outcomes as percents		Mid-Pre			Outcomes as percents		Mid-Pre	Post-Pre
FOR10	0	-2.8	0.7		AF10	0	-0.9	-2.1		C10	0	1.3	0.3										P value	0.793955				P value	0.0107549				P value	0.00862488	0.93774
					AF11	0	0.8	1.5															Confidence level (%)	90				Confidence level (%)	90				Confidence level (%)	90	90
Mean	0	-1.45	0.21			0	-0.9	0.0454545			0	0.03	-0.55										Degrees of freedom	16.3919				Degrees of freedom	15.0323				Degrees of freedom	17.9457	15.5847
SD	0	1.69984	1.52494			0	2.16518	2.52878			0	0.976445	1.47516										Difference in means (%)	-7.30356				Difference in means (%)	-55.6604				Difference in means (%)	-52.1669	2.28794
																						possibly	unlikely				unlikely	unlikely				very unlikely	possibly
																					substantially negative (-ive) or beneficial	19.3128	77.1949			substantially negative (-ive) or beneficial	86.7771	46.288			substantially negative (-ive) or beneficial	98.276	13.3395
																						unlikely	likely				likely	possibly				very likely	unlikely
																						UNCLEAR	UNCLEAR				Decrease	UNCLEAR				decrease	UNCLEAR
																											Trivial to very large					small to very large
																				CTL vs AF					CTL vs FOR					AF vs FOR
																				Outcomes as percents		Mid-Pre	Post-Pre		Outcomes as percents		Mid-Pre	Post-Pre		Outcomes as percents		Mid-Pre	Post-Pre
																					Confidence level (%)	90	90			Confidence level (%)	90	90			Confidence level (%)	90	90
																					Degrees of freedom	14.4668	16.9993			Degrees of freedom	14.2405	17.7815			Degrees of freedom	18.8469	13.8833
																					Difference in means (%)	-8.13325	3.64313			Difference in means (%)	-12.6748	7.37781			Difference in means (%)	-4.94357	4.78825
																				Confidence limits (approx.)	lower	-17.055	-8.34899		Confidence limits (approx.)	lower	-20.295	-1.9037		Confidence limits (approx.)	lower	-15.6463	-7.85585
																					upper	1.74816	17.2044			upper	-4.32593	17.5375			upper	7.11711	19.1674
																					"±" approx.	9.40159	12.7767			"±" approx.	7.98455	9.7206			"±" approx.	11.3817	13.5116
																				Thresholds for inferences	+ive or harmful	1.7	1.7		Thresholds for inferences	+ive or harmful	1.7	1.7		Thresholds for inferences	+ive or harmful	1.7	1.7
	11	13.3	12			8.6	8.3	8.9			12.7	12.3	10.4		-0.4	-2.3					-ive or beneficial	-1.67158	-1.67158			-ive or beneficial	-1.67158	-1.67158			-ive or beneficial	-1.67158	-1.67158
	10.7	9.8	13.2			14.8	10.9	16.3			11.9	12.2	12.2		0.3	0.3				Chances (% and qualitative) that the true value of the statistic is mechanistically or clinically (practically)…	substantially positive (+ive) or harmful	5.07174	60.4209		Chances (% and qualitative) that the true value of the statistic is mechanistically or clinically (practically)…	substantially positive (+ive) or harmful	0.538331	84.4757		Chances (% and qualitative) that the true value of the statistic is mechanistically or clinically (practically)…	substantially positive (+ive) or harmful	16.9868	65.6469
	9.1	8.1	9.3			11.8	15.1	17.1			14	12.1	10.7		-1.9	-3.3						unlikely	possibly				very unlikely	likely				unlikely	possibly
	11.1	9.1	11			11.6	10.3	10.2			9.7	11.1	10.3		1.4	0.6					trivial	7.968	16.2957			trivial	1.36783	10.1002			trivial	14.4713	14.5147
	13.9	11.9	13.2			13.1	9.6	14.9			12	11.9	12.9		-0.1	0.9						unlikely	unlikely				very unlikely	unlikely				unlikely	unlikely
	14.2	11.4	14.6			14.1	11.3	12.3			12.1	12.2	11.4		0.1	-0.7					substantially negative (-ive) or beneficial	86.9603	23.2833			substantially negative (-ive) or beneficial	98.0938	5.42406			substantially negative (-ive) or beneficial	68.5419	19.8384
	14.3	14.3	15.4			10.4	10.1	10.8			14.3	14.3	13.6		0	-0.7						likely	unlikely				very likely	unlikely				possibly	unlikely
	17.4	13.7	14			14.1	11.9	9.9			13.9	13	15		-0.9	1.1						unclear	unclear				decrease	unclear				unclear	unclear
	12	10.4	12.4			10.7	11.9	9.9			12.1	12.6	10.4		0.5	-1.7											small to
	10.2	7.4	10.9			11.7	10.8	9.6			11.3	12.6	11.6		1.3	0.3											very large
						13.9	14.7	15.4
															0.03	-0.55
															0.976445	1.47516

## Sheet: NAd_At_Exhaustion
	Pre	Post	T2			Pre	Post	T2			Pre	Post	T2							Groupe CTL					Groupe AF					Groupe F-OR
FOR1					AF1	70462	64752	59871	-0.0810366	C1	77271	44988	54765							Outcomes as percents		Mid-Pre	Post-Pre		Outcomes as percents		Mid-Pre	Post-Pre		Outcomes as percents		Mid-Pre	Post-Pre
FOR2	19001	28116	18349	0.479712	AF2	29378	36565	40325	0.244639	C2											P value	0.817894	0.171372			P value	0.37879	0.522531			P value	0.200248	0.14114
FOR3	34066	23214	33382	-0.318558	AF3	48638	57047	46445	0.17289	C3	26767	27344	26079								Confidence level (%)	90	90			Confidence level (%)	90	90			Confidence level (%)	90	90
FOR4	47044	35000	47790	-0.256016	AF4	23199	13433	16444	-0.420966	C4	51282	68367	90079								Degrees of freedom	8	8			Degrees of freedom	10	10			Degrees of freedom	8	8
FOR5	21930	31771	12501	0.448746	AF5	42271	39256	50781	-0.0713255	C5	73801	51434	73837								Change in mean (%)	2.80089	13.8071			Change in mean (%)	13.4089	8.53566			Change in mean (%)	-18.7658	-13.1745
FOR6	50001	16988	55666	-0.660247	AF6	15603	52728	45401	2.37935	C6	21704	30781	31744							Confidence limits (approx.)	lower	-17.1587	-3.02679		Confidence limits (approx.)	lower	-11.4697	-13.2486		Confidence limits (approx.)	lower	-38.411	-26.0773
FOR7	49334	44219	51178	-0.103681	AF7	36675	63126	54533	0.721227	C7	42370	73380	46787								upper	27.5695	33.5633			upper	45.2788	35.7902			upper	7.14579	1.98053
FOR8	75515	50542	59105	-0.330703	AF8	25297	30615	22784	0.210223	C8	35201	31170	37888								"±" approx.	24.0938	17.3593			"±" approx.	28.1018	25.1112			"±" approx.	31.8973	17.4545
FOR9	58011	41009	58224	-0.293082	AF9	40923	40923	30000	0	C9	22376	26146	28018							Thresholds for inferences	+ive or harmful	8.1	8.1		Thresholds for inferences	+ive or harmful	8.1	8.1		Thresholds for inferences	+ive or harmful	8.1	8.1
FOR10	27167	26725	15324	-0.0162697	AF10	42024	37778	33532	-0.101038	C10	56260	51368	68216								-ive or beneficial	-7.49306	-7.49306			-ive or beneficial	-7.49306	-7.49306			-ive or beneficial	-7.49306	-7.49306
					AF11	48468	42377	55202	-0.125671											Chances (% and qualitative) that the true value of the statistic is mechanistically or clinically (practically)…	substantially positive (+ive) or harmful	33.8233	71.6708		Chances (% and qualitative) that the true value of the statistic is mechanistically or clinically (practically)…	substantially positive (+ive) or harmful	63.3519	51.2659		Chances (% and qualitative) that the true value of the statistic is mechanistically or clinically (practically)…	substantially positive (+ive) or harmful	4.5621	1.75423
Mean	42452.1	33064.9	39057.7	-0.116678		38448.9	43509.1	41392.5			45225.8	44997.6	50823.7									possibly	possibly				possibly	possibly				very unlikely	very unlikely
SD	18492.4	10715.5	19358	0.373865		15084.6	15107.3	14128			20995.9	17656.6	22551.8								trivial	46.6785	26.1948			trivial	28.3061	37.4761			trivial	15.8477	22.481
FOR1	0	0	0		AF1	0	-5710	-10591		C1	0	-32283	-22506									possibly	possibly				possibly	possibly				unlikely	unlikely
FOR2	0	9115	-652		AF2	0	7187	10947		C2	0	0	0								substantially negative (-ive) or beneficial	19.4982	2.13437			substantially negative (-ive) or beneficial	8.34207	11.258			substantially negative (-ive) or beneficial	79.5902	75.7648
FOR3	0	-10852	-684		AF3	0	8409	-2193		C3	0	577	-688									unlikely	very unlikely				unlikely	unlikely				likely	likely
FOR4	0	-12044	746		AF4	0	-9766	-6755		C4	0	17085	38797
FOR5	0	9841	-9429		AF5	0	-3015	8510		C5	0	-22367	36									unclear	trivial to small increase				unclear	unclear				trivial	trivial
FOR6	0	-33013	5665		AF6	0	37125	29798		C6	0	9077	10040																			to moderate decrease	to moderate decrease
FOR7	0	-5115	1844		AF7	0	26451	17858		C7	0	31010	4417
FOR8	0	-24973	-16410		AF8	0	5318	-2513		C8	0	-4031	2687							Groupe CTL Vs AF					Groupe CTL Vs F-OR					Groupe AF Vs F-OR
FOR9	0	-17002	213		AF9	0	0	-10923		C9	0	3770	5642							Outcomes as percents		Mid-Pre	Post-Pre		Outcomes as percents		Mid-Pre	Post-Pre		Outcomes as percents		Mid-Pre	Post-Pre
FOR10	0	-442	-11843		AF10	0	-4246	-8492		C10	0	-4892	11956								Confidence level (%)	90	90			Confidence level (%)	90	90			Confidence level (%)	90	90
					AF11	0	-6091	6734													Degrees of freedom	17.9537	17.0414			Degrees of freedom	15.1022	15.9996			Degrees of freedom	8.00821	8.2018
Mean	0	-8448.5	-3055			0	5060.18	2943.64			0	-205.4	5038.1								Difference in means (%)	10.319	-4.63192			Difference in means (%)	-20.979	-23.7082			Difference in means (%)	-20.1045	-16.587
SD	0	13975.8	7008.79			0	14625.7	13074.7			0	18051.4	15131.6							Confidence limits (approx.)	lower	-19.2406	-26.6155		Confidence limits (approx.)	lower	-43.2444	-38.4028		Confidence limits (approx.)	lower	-39.4303	-29.0545
																					upper	50.698	23.9372			upper	10.0211	-5.50791			upper	5.38745	-1.92863
																					"±" approx.	34.9693	25.2764			"±" approx.	26.6328	16.4475			"±" approx.	22.4089	13.5629
																				Thresholds for inferences	+ive or harmful	8.1	8.1		Thresholds for inferences	+ive or harmful	8.1	8.1		Thresholds for inferences	+ive or harmful	8.1	8.1
																					-ive or beneficial	-7.49306	-7.49306			-ive or beneficial	-7.49306	-7.49306			-ive or beneficial	-7.49306	-7.49306
																				Chances (% and qualitative) that the true value of the statistic is mechanistically or clinically (practically)…	substantially positive (+ive) or harmful	54.4452	20.8488		Chances (% and qualitative) that the true value of the statistic is mechanistically or clinically (practically)…	substantially positive (+ive) or harmful	5.8861	0.601666		Chances (% and qualitative) that the true value of the statistic is mechanistically or clinically (practically)…	substantially positive (+ive) or harmful	3.84169	0.882881
																						possibly	unlikely				unlikely	very unlikely				very unlikely	very unlikely
																					trivial	28.5647	37.0441			trivial	14.9649	6.15688			trivial	13.8509	12.551
																						possibly	possibly				unlikely	unlikely				unlikely	unlikely
																					substantially negative (-ive) or beneficial	16.9901	42.1071			substantially negative (-ive) or beneficial	79.149	93.2415			substantially negative (-ive) or beneficial	82.3074	86.5661
																						unlikely	possibly				likely	likely				likely	likely
																						unclear	unclear				trivial to	trivial to				trivial	trivial
																											moderate decrease	moderate decrease				to moderate	to moderate
																																decrease	decrease

## Sheet: Ad_At_Exhaustion
	Pre	Post	T2			Pre	Post	T2			Pre	Post	T2
FOR1					AF1	6973	7210	6403	0.0339882	C1	10830	5720	5441									Groupe CTL					Groupe AF					Groupe F-OR
FOR2	6600	2820	6642	-0.572727	AF2	4612	6965	7433	0.510191	C2												Outcomes as percents		Mid-Pre	Post-Pre		Outcomes as percents		Mid-Pre	Post-Pre		Outcomes as percents		Mid-Pre	Post-Pre
FOR3	4459	3839	6914	-0.139045	AF3	7916	10551	11170	0.33287	C3	3655	7156	3463										P value	0.976355	0.509131			P value	0.657148	0.715116			P value	0.00134708	0.859867
FOR4	4191	3000	6199	-0.28418	AF4	6779	2460	2546	-0.637115	C4	8084	8305	13826										Confidence level (%)	90	90			Confidence level (%)	90	90			Confidence level (%)	90	90
FOR5	10000	5160	2978	-0.484	AF5	12913	9915	16121	-0.232169	C5	10206	3098	10206										Degrees of freedom	8	8			Degrees of freedom	10	10			Degrees of freedom	8	8
FOR6	8100	2496	17758	-0.691852	AF6	11030	4230	4592	-0.6165	C6	8196	9307	7947										Change in mean (%)	-0.674138	9.63724			Change in mean (%)	-7.92846	-6.21475			Change in mean (%)	-55.9594	-4.069
FOR7	39998	19936	30604	-0.501575	AF7	2765	7940	6118	1.87161	C7	11697	19460	11873									Confidence limits (approx.)	lower	-34.1716	-14.41		Confidence limits (approx.)	lower	-33.6293	-31.1916		Confidence limits (approx.)	lower	-67.9357	-37.2012
FOR8	20339	5179	7436	-0.745366	AF8	3100	4143	4355	0.336452	C8	14401	7662	14458										upper	49.8689	40.4408			upper	27.7245	27.8285			upper	-39.5096	46.5435
FOR9	22696	4103	22696	-0.819219	AF9	23303	18642.4	15535	-0.2	C9	2067	3615	4017										"±" approx.	50.8861	28.0959			"±" approx.	38.7231	36.2992			"±" approx.	37.3512	52.7593
FOR10	4237	2749	6916	-0.351192	AF10	4054	3309	2564	-0.183769	C10	2605	4324	3814									Thresholds for inferences	+ive or harmful	15.5	15.5		Thresholds for inferences	+ive or harmful	15.5	15.5		Thresholds for inferences	+ive or harmful	15.5	15.5
					AF11	23924	17302	22109	-0.276793														-ive or beneficial	-13.4199	-13.4199			-ive or beneficial	-13.4199	-13.4199			-ive or beneficial	-13.4199	-13.4199
Mean	13402.2	5475.78	12015.9	-0.509906		9760.82	8424.31	8995.09			7971.22	7627.44	8338.33									Chances (% and qualitative) that the true value of the statistic is mechanistically or clinically (practically)…	substantially positive (+ive) or harmful	25.7251	35.2923		Chances (% and qualitative) that the true value of the statistic is mechanistically or clinically (practically)…	substantially positive (+ive) or harmful	11.8944	12.5429		Chances (% and qualitative) that the true value of the statistic is mechanistically or clinically (practically)…	substantially positive (+ive) or harmful	0.0240931	21.9394
SD	12127.5	5515.28	9420.5	0.224329		7536.49	5398.77	6415.28			4340.79	4933.05	4401.8											possibly	possibly				unlikely	unlikely				most unlikely	unlikely
FOR1	0	0	0		AF1	0	237	-570		C1	0	-5110	-5389										trivial	46.6758	59.0011			trivial	51.0805	54.9609			trivial	0.184588	44.8321
FOR2	0	-3780	42		AF2	0	2353	2821		C2	0	0	0											possibly	possibly				possibly	possibly				most unlikely	possibly
FOR3	0	-620	2455		AF3	0	2635	3254		C3	0	3501	-192										substantially negative (-ive) or beneficial	27.5991	5.70664			substantially negative (-ive) or beneficial	37.0251	32.4962			substantially negative (-ive) or beneficial	99.7913	33.2285
FOR4	0	-1191	2008		AF4	0	-4319	-4233		C4	0	221	5742											possibly	unlikely				possibly	possibly				most likely	possibly
FOR5	0	-4840	-7022		AF5	0	-2998	3208		C5	0	-7108	0											unclear	unclear				unclear	unclear				decrease small	unclear
FOR6	0	-5604	9658		AF6	0	-6800	-6438		C6	0	1111	-249																					to moderate
FOR7	0	-20062	-9394		AF7	0	5175	3353		C7	0	7763	176
FOR8	0	-15160	-12903		AF8	0	1043	1255		C8	0	-6739	57									Groupe CTL Vs AF					Groupe CTL Vs F-OR					Groupe AF Vs F-OR
FOR9	0	-18593	0		AF9	0	-4660.6	-7768		C9	0	1548	1950									Outcomes as percents		Mid-Pre	Post-Pre		Outcomes as percents		Mid-Pre	Post-Pre		Outcomes as percents		Mid-Pre	Post-Pre
FOR10	0	-1488	2679		AF10	0	-745	-1490		C10	0	1719	1209										P value	0.793955	0.480747			P value	0.0107549	0.62199			P value	0.00862488	0.93774
					AF11	0	-6622	-1815															Confidence level (%)	90	90			Confidence level (%)	90	90			Confidence level (%)	90	90
Mean	0	-7133.8	-1247.7			0	-1336.51	-765.727			0	-309.4	330.4										Degrees of freedom	16.3919	17.6824			Degrees of freedom	15.0323	12.8937			Degrees of freedom	17.9457	15.5847
SD	0	7761.97	6658.25			0	4009.55	4009.4			0	4716.97	2714.52										Difference in means (%)	-7.30356	-14.4586			Difference in means (%)	-55.6604	-12.5014			Difference in means (%)	-52.1669	2.28794
																						Confidence limits (approx.)	lower	-43.6959	-41.3161		Confidence limits (approx.)	lower	-72.831	-45.3324		Confidence limits (approx.)	lower	-68.9542	-37.9134
																							upper	52.6111	24.6906			upper	-27.6383	40.0463			upper	-26.3024	68.5197
																							"±" approx.	64.6353	45.7663			"±" approx.	63.1989	60.0556			"±" approx.	54.0724	64.7503
																						Thresholds for inferences	+ive or harmful	15.5	15.5		Thresholds for inferences	+ive or harmful	15.5	15.5		Thresholds for inferences	+ive or harmful	15.5	15.5
																							-ive or beneficial	-13.4199	-13.4199			-ive or beneficial	-13.4199	-13.4199			-ive or beneficial	-13.4199	-13.4199
																						Chances (% and qualitative) that the true value of the statistic is mechanistically or clinically (practically)…	substantially positive (+ive) or harmful	22.6203	9.18065		Chances (% and qualitative) that the true value of the statistic is mechanistically or clinically (practically)…	substantially positive (+ive) or harmful	0.187368	15.6743		Chances (% and qualitative) that the true value of the statistic is mechanistically or clinically (practically)…	substantially positive (+ive) or harmful	0.123685	33.7884
																								unlikely	unlikely				most unlikely	unlikely				most unlikely	possibly
																							trivial	36.674	38.6302			trivial	1.31817	35.8876			trivial	1.31729	37.8628
																								possibly	possibly				very unlikely	possibly				very unlikely	possibly
																							substantially negative (-ive) or beneficial	40.7056	52.1891			substantially negative (-ive) or beneficial	98.4945	48.4381			substantially negative (-ive) or beneficial	98.559	28.3488
																								possibly	possibly				very likely	possibly				very likely	possibly
																								unclear	unclear				decrease small	unclear				decrease small	unclear
																													to moderate					to moderate
